# Supplementary material for: Stochastic priming and spatial cues orchestrate heterogeneous clonal contribution to mouse pancreas organogenesis
Source: PubMed Central journal article supplement (PMC5605525; doi:10.1038/s41467-017-00258-4), 2017-09-19
Supplement: 41467_2017_258_MOESM1_ESM.pdf [file 41467_2017_258_MOESM1_ESM.pdf]

File Name: Peer Review File

Description:

File Name: Supplementary Information

Description: Supplementary Figures, Supplementary Tables.

File Name: Supplementary Software

Description: This folder contains all the code necessary to generate and analyze the simulation data for the experiment. The code is written in python3, and is supplied in both jupyter notebook (.ipynb), python (.py) and HyperText Markup Language (.html) format. The readme file provides information on how to use the software.

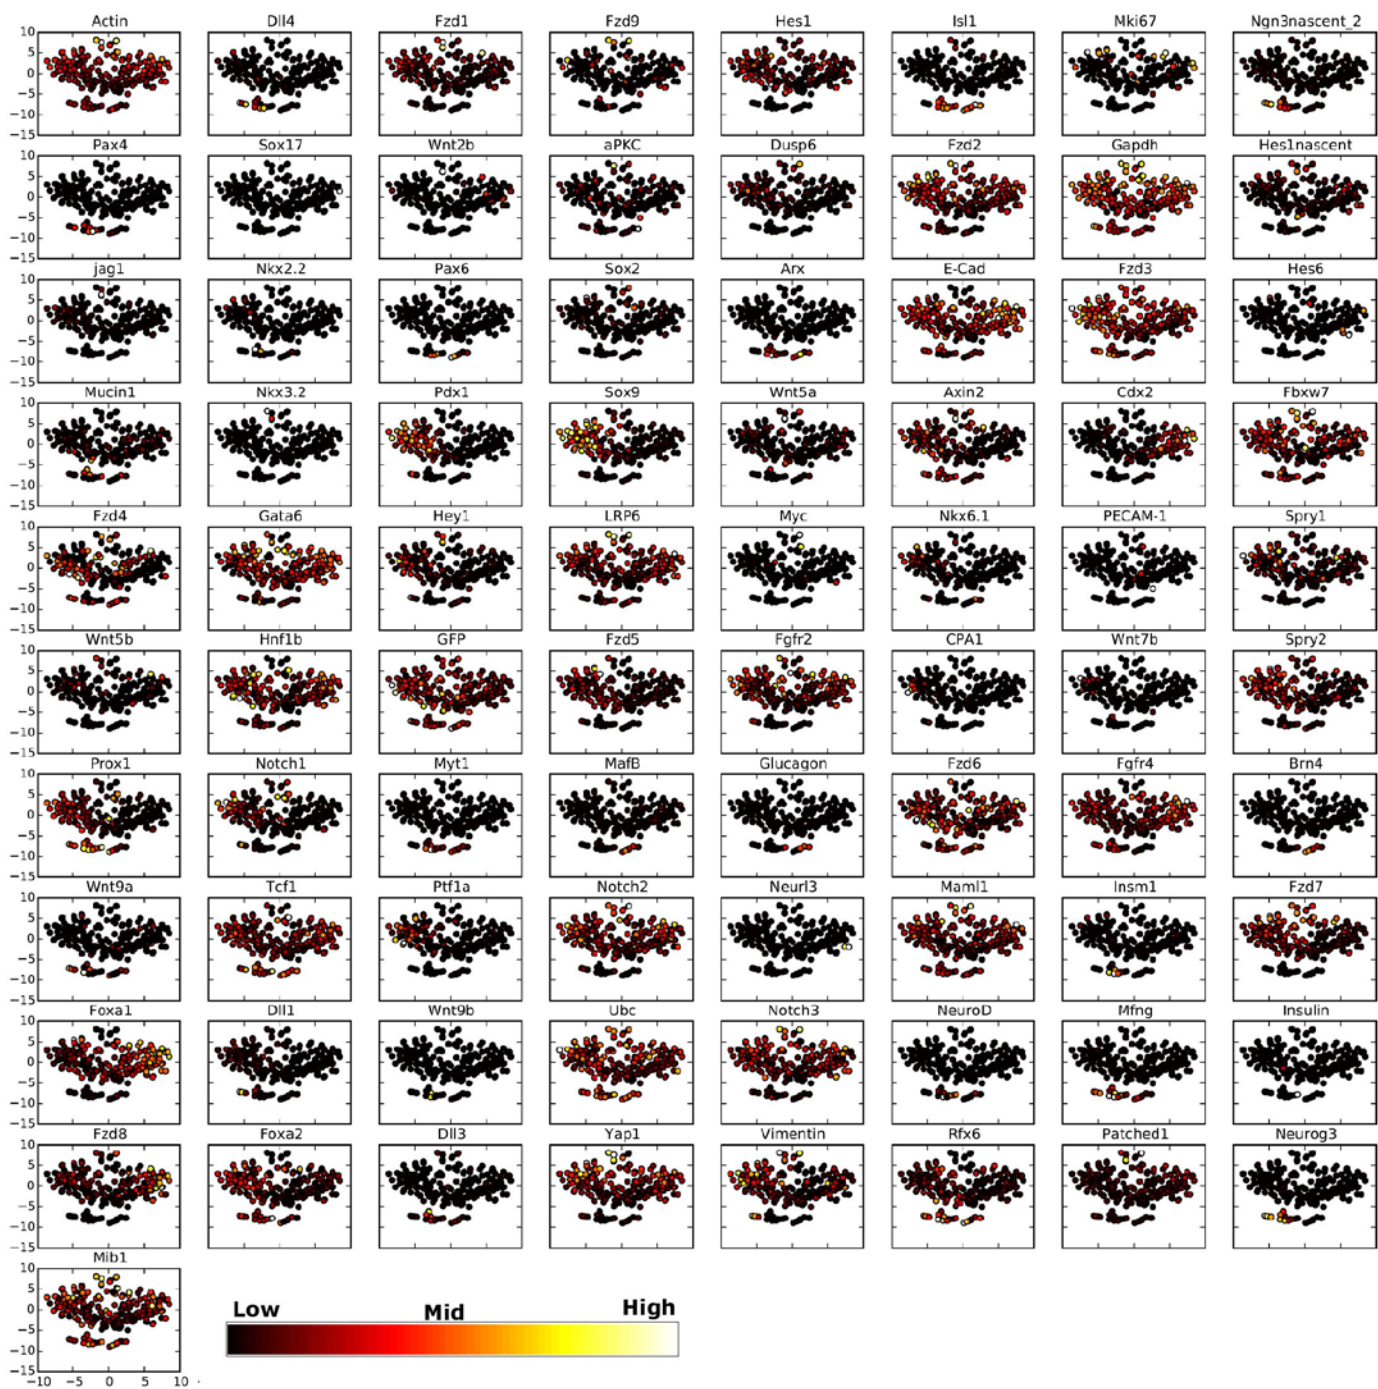

**Supplementary Figure 1. Gene expression levels in single cells.** tSNE distribution of all single cells and associated normalized expression levels of all functional gene targets.

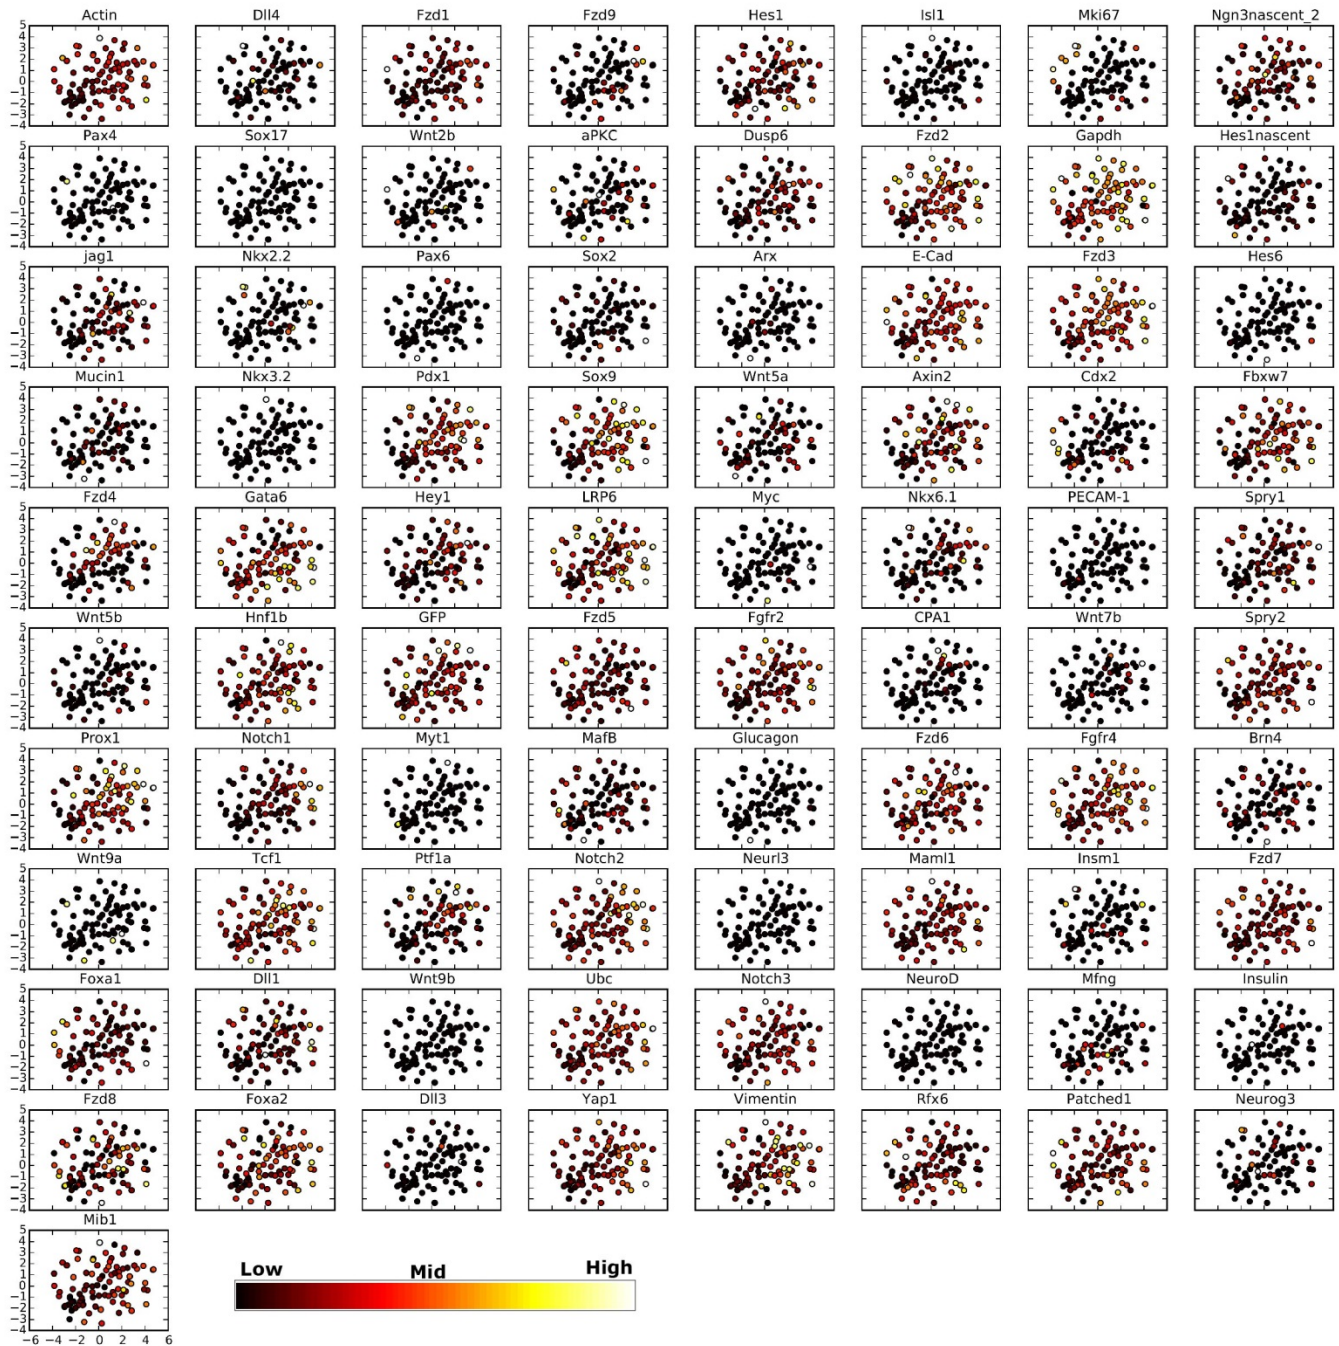

**Supplementary Figure 2. Gene expression levels in *Pdx1*<sup>+</sup> pancreatic progenitors.** tSNE distribution of *Pdx1*<sup>+</sup> progenitors and associated normalized expression levels of all functional gene targets.



| <b>Pdx1</b>   | <b>Correlation</b> |
|---------------|--------------------|
| <i>Notch1</i> | 0.607              |
| <i>Sox9</i>   | 0.548              |
| <i>Nkx6.1</i> | 0.481              |
| <i>Prox1</i>  | 0.477              |
| <i>Fzd3</i>   | 0.472              |
| <i>Fbxw7</i>  | 0.449              |
| <i>Ptf1a</i>  | 0.428              |
| <i>Yap1</i>   | 0.39               |
| <i>Cdx2</i>   | -0.356             |
| <i>Isl1</i>   | -0.304             |
| <i>Myt1</i>   | -0.261             |
| <i>Wnt9b</i>  | -0.203             |
| <i>MafB</i>   | -0.189             |
| <i>Pax6</i>   | -0.18              |

| <b>Sox9</b>     | <b>Correlation</b> |
|-----------------|--------------------|
| <i>Pdx1</i>     | 0.548              |
| <i>Gapdh</i>    | 0.522              |
| <i>Spry1</i>    | 0.518              |
| <i>Prox1</i>    | 0.491              |
| <i>E-Cad</i>    | 0.402              |
| <i>Yap1</i>     | 0.386              |
| <i>Fzd7</i>     | 0.345              |
| <i>Notch1</i>   | 0.336              |
| <i>Isl1</i>     | -0.357             |
| <i>Dll3</i>     | -0.294             |
| <i>Pax6</i>     | -0.288             |
| <i>Myt1</i>     | -0.283             |
| <i>Glucagon</i> | -0.272             |
| <i>Wnt9b</i>    | -0.271             |

| <b>Hes1</b>     | <b>Correlation</b> |
|-----------------|--------------------|
| <i>Fzd7</i>     | 0.299              |
| <i>Notch2</i>   | 0.285              |
| <i>Sox9</i>     | 0.266              |
| <i>Fzd1</i>     | 0.266              |
| <i>Spry1</i>    | 0.253              |
| <i>Yap1</i>     | 0.218              |
| <i>Myt1</i>     | -0.321             |
| <i>Dll3</i>     | -0.277             |
| <i>Pecam-1</i>  | -0.273             |
| <i>Wnt9b</i>    | -0.217             |
| <i>Mfng</i>     | -0.216             |
| <i>Pax6</i>     | -0.21              |
| <i>Glucagon</i> | -0.209             |

| <b>Hnf1b</b>  | <b>Correlation</b> |
|---------------|--------------------|
| <i>Notch3</i> | 0.422              |
| <i>Foxa1</i>  | 0.355              |
| <i>Yap1</i>   | 0.34               |
| <i>E-Cad</i>  | 0.336              |
| <i>Rfx6</i>   | 0.301              |
| <i>Nkx3.2</i> | -0.392             |
| <i>Dll3</i>   | -0.318             |

| <b>Ptf1a</b>   | <b>Correlation</b> |
|----------------|--------------------|
| <i>Pdx1</i>    | 0.428              |
| <i>Fbxw7</i>   | 0.36               |
| <i>Notch1</i>  | 0.349              |
| <i>Yap1</i>    | 0.324              |
| <i>Mfng</i>    | -0.305             |
| <i>Neurog3</i> | -0.279             |
| <i>Myt1</i>    | -0.255             |

| <b>Nkx6.1</b> | <b>Correlation</b> |
|---------------|--------------------|
| <i>Pdx1</i>   | 0.481              |
| <i>Notch1</i> | 0.404              |
| <i>Hey1</i>   | 0.375              |
| <i>Prox1</i>  | 0.318              |
| <i>Cdx2</i>   | -0.307             |
| <i>Fzd6</i>   | -0.236             |

| <b>Neurog3</b>         | <b>Correlation</b> |
|------------------------|--------------------|
| <i>Dll4</i>            | 0.577              |
| <i>Dll3</i>            | 0.515              |
| <i>Neurog3 nascent</i> | 0.49               |
| <i>Mfng</i>            | 0.482              |
| <i>Pax4</i>            | 0.426              |
| <i>Myt1</i>            | 0.414              |
| <i>Wnt9a</i>           | 0.261              |
| <i>Wnt9b</i>           | 0.321              |
| <i>Insm1</i>           | 0.315              |
| <i>Dll1</i>            | 0.292              |
| <i>Foxa1</i>           | -0.338             |
| <i>Cdx2</i>            | -0.31              |
| <i>Dusp6</i>           | -0.292             |
| <i>Fzd7</i>            | -0.289             |
| <i>Ptf1a</i>           | -0.279             |

| <b>Mfng</b>    | <b>Correlation</b> |
|----------------|--------------------|
| <i>Myt1</i>    | 0.631              |
| <i>Pax4</i>    | 0.626              |
| <i>Dll3</i>    | 0.516              |
| <i>Arx</i>     | 0.497              |
| <i>Neurog3</i> | 0.482              |
| <i>Dll4</i>    | 0.424              |
| <i>Pax6</i>    | 0.385              |
| <i>Wnt9a</i>   | 0.34               |
| <i>Fzd7</i>    | -0.574             |
| <i>Yap1</i>    | -0.442             |
| <i>Notch2</i>  | -0.38              |
| <i>Fzd5</i>    | -0.363             |
| <i>Fgfr2</i>   | -0.36              |

| <b>Dll1</b>            | <b>Correlation</b> |
|------------------------|--------------------|
| <i>Notch1</i>          | 0.345              |
| <i>Fgfr2</i>           | 0.344              |
| <i>Pdx1</i>            | 0.334              |
| <i>Actin</i>           | 0.294              |
| <i>Neurog3</i>         | 0.292              |
| <i>Neurog3 nascent</i> | 0.277              |
| <i>Cdx2</i>            | -0.312             |

**Supplementary Figure 3. Gene correlations of selected genes.** The correlation coefficients of top correlating (blue) and anti-correlating (red) genes with selected pancreatic progenitor and endocrine precursor markers.

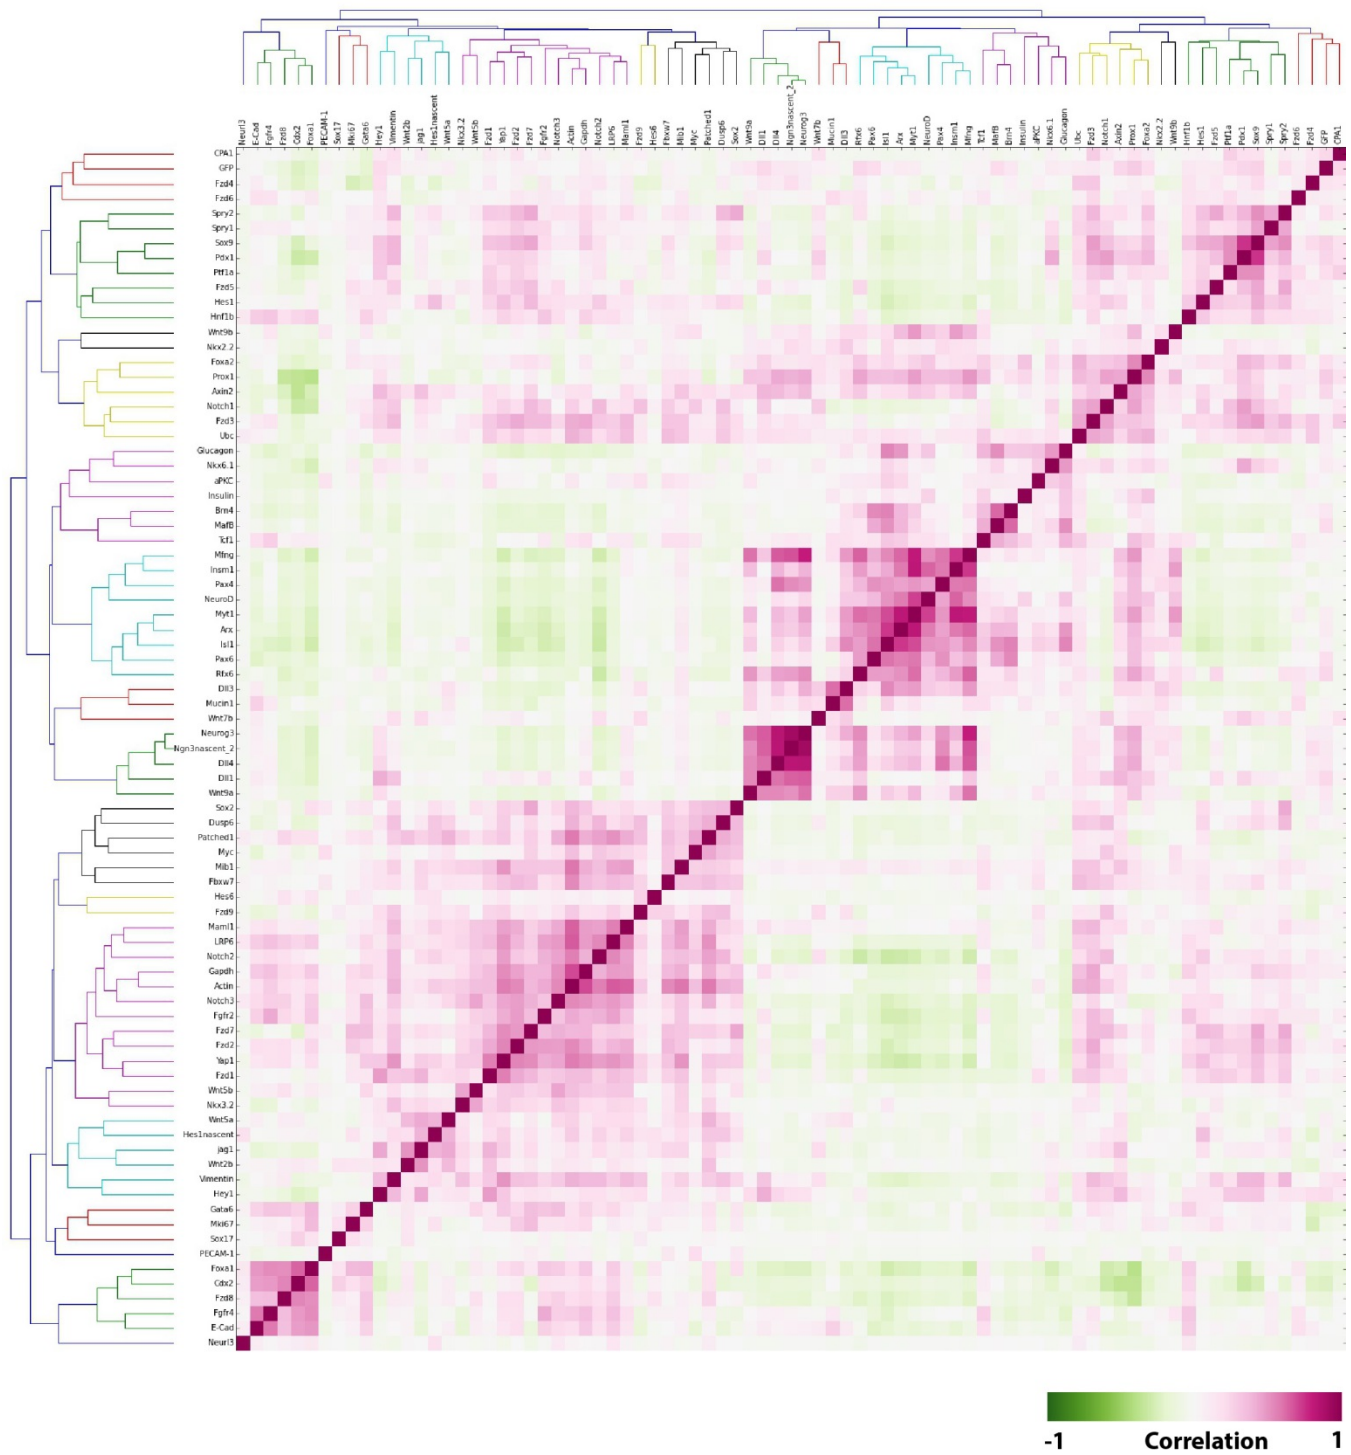

**Supplementary Figure 4. Unsupervised hierarchical clustering of gene correlations of all targets.** Note the clustering of genes associated with distinct phases of endocrine priming, endocrine differentiation onset, endocrine maturation as well as clusters associated with the pancreatic progenitor state.

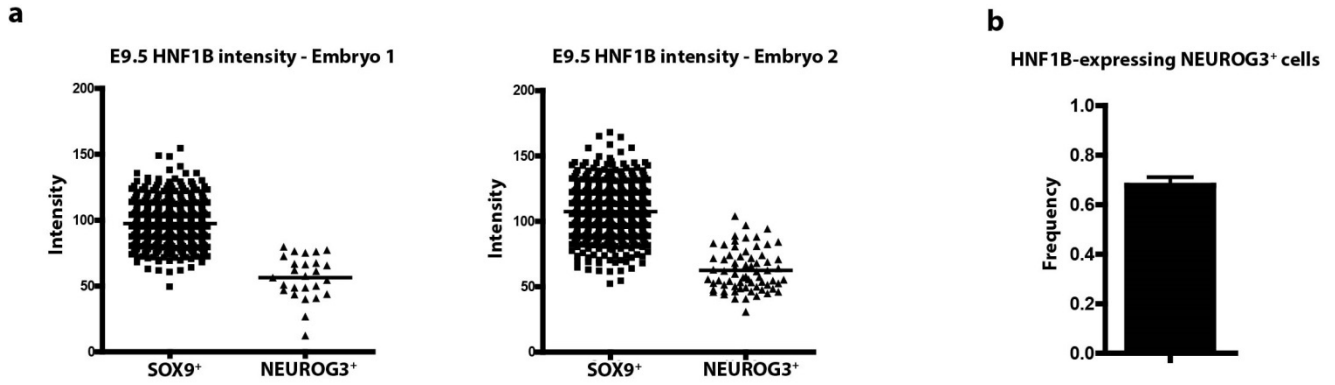

**Supplementary Figure 5. HNF1B expression in E9.5 pancreatic progenitors and endocrine precursors. (a)** HNF1B immunofluorescence intensity in SOX9<sup>+</sup> pancreatic progenitors and NEUROG3<sup>+</sup> endocrine precursors in two separate embryos. **(b)** The frequency of HNF1B-expression NEUROG3<sup>+</sup> cells from the two embryos. Mean frequency and standard deviation is indicated. The lowest detectable HNF1B intensity value in SOX9<sup>+</sup> progenitors was used to set the threshold for scoring NEUROG3<sup>+</sup> cells as HNF1B<sup>+</sup> or HNF1B<sup>-</sup> in individual embryos (n=2).

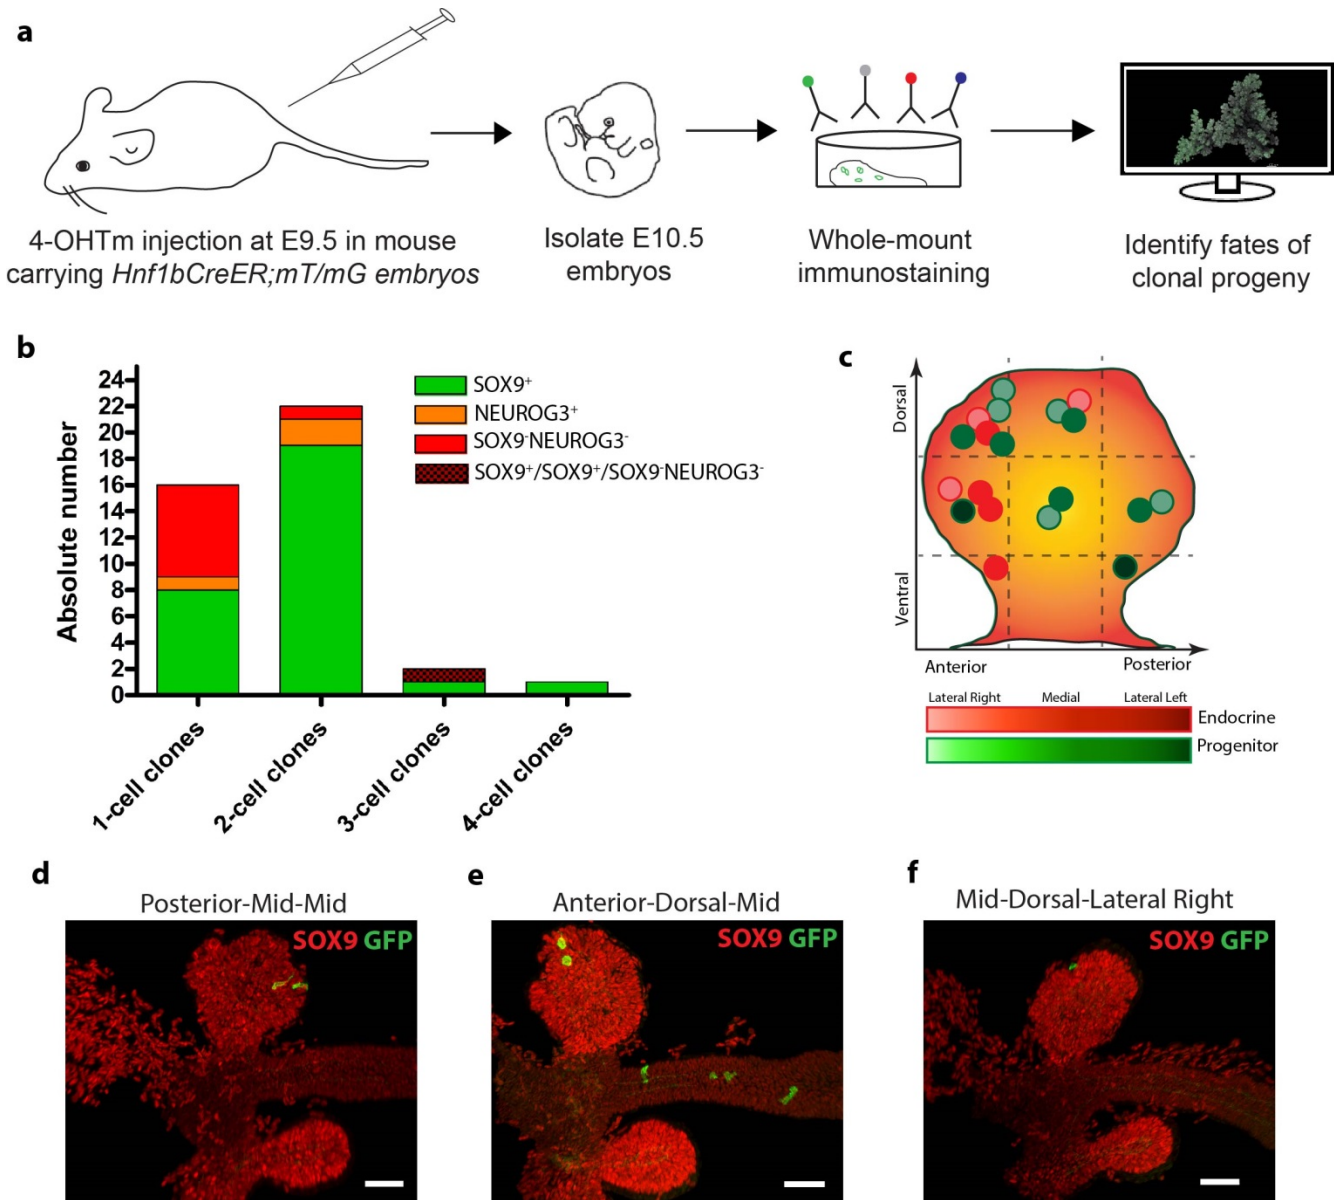

**Supplementary Figure 6. E9.5-E10.5 *Hnf1b*<sup>CreER</sup>-based lineage tracing reveals absence of spatial bias in induction of GFP<sup>+</sup> progeny.** (a) Schematic overview of strategy employed to trace the fate and spatial location of progenitors labelled at E9.5. (b) Quantification of clone size and cell fates at E10.5. GFP<sup>+</sup> cells were scored as clonal if present within a radius of 30  $\mu$ m as previously reported in Kim et al. 2015<sup>1</sup>. (c) Spatial map of GFP<sup>+</sup> location according to cellular fate. The map incorporates data from single-cell and two-cell clones (n=19). Clone position within the E10.5 bud was scored in the dorso-ventral, anterior-posterior and lateral-medial axes and placed into the respective by arbitrary jittering. (d-f) 3D MIP examples of clonal progeny displaying the spatial location indicated above each image. Note that GFP<sup>+</sup> cells are present in the duodenum in the middle panel as the expression pattern of *Hnf1b* permits *Hnf1b*<sup>CreER</sup>-mediated lineage tracing in the duodenum. Scale bars, 50  $\mu$ m.



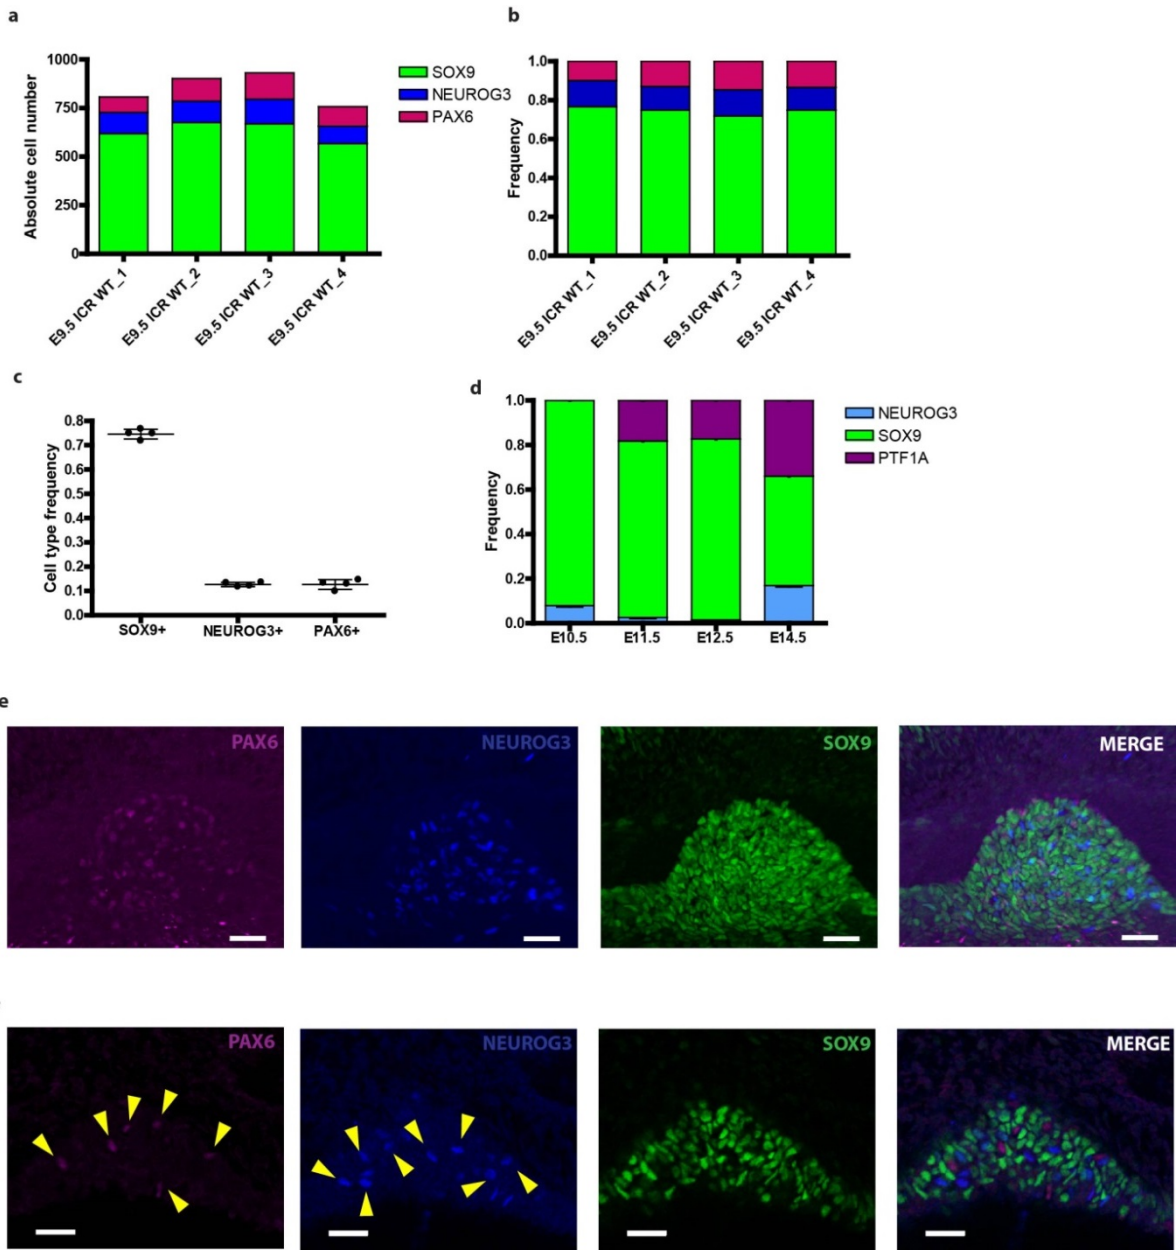

**Supplementary Figure 7. Quantification of cell proportions at E9.5.** (a) Absolute number of SOX9<sup>+</sup> progenitors, NEUROG3<sup>+</sup> endocrine precursors and PAX6<sup>+</sup> endocrine cells in E9.5 WT dorsal buds in 4 embryos. All cells were manually counted in 3D using Imaris™ software. (b) Frequency of indicated cell types in the same embryos as indicated in (a). (c) Compiled distribution of different cell types from the same samples. Mean frequency and standard deviation are indicated. (d) Frequency of indicated cell types at various stages (n=2 per stage) of pancreas development. For E11.5 and E12.5, PTF1A cells were identified as cells expressing high levels of PTF1A (see materials and methods). Scale bars, 30 μm. (e) 3D MIP example of staining for the indicated markers at E9.5. (f) Optical section from same embryo as in (e) indicating detection of PAX6<sup>+</sup> and NEUROG3<sup>+</sup> cells (arrowheads). Scale bars, 20 μm.



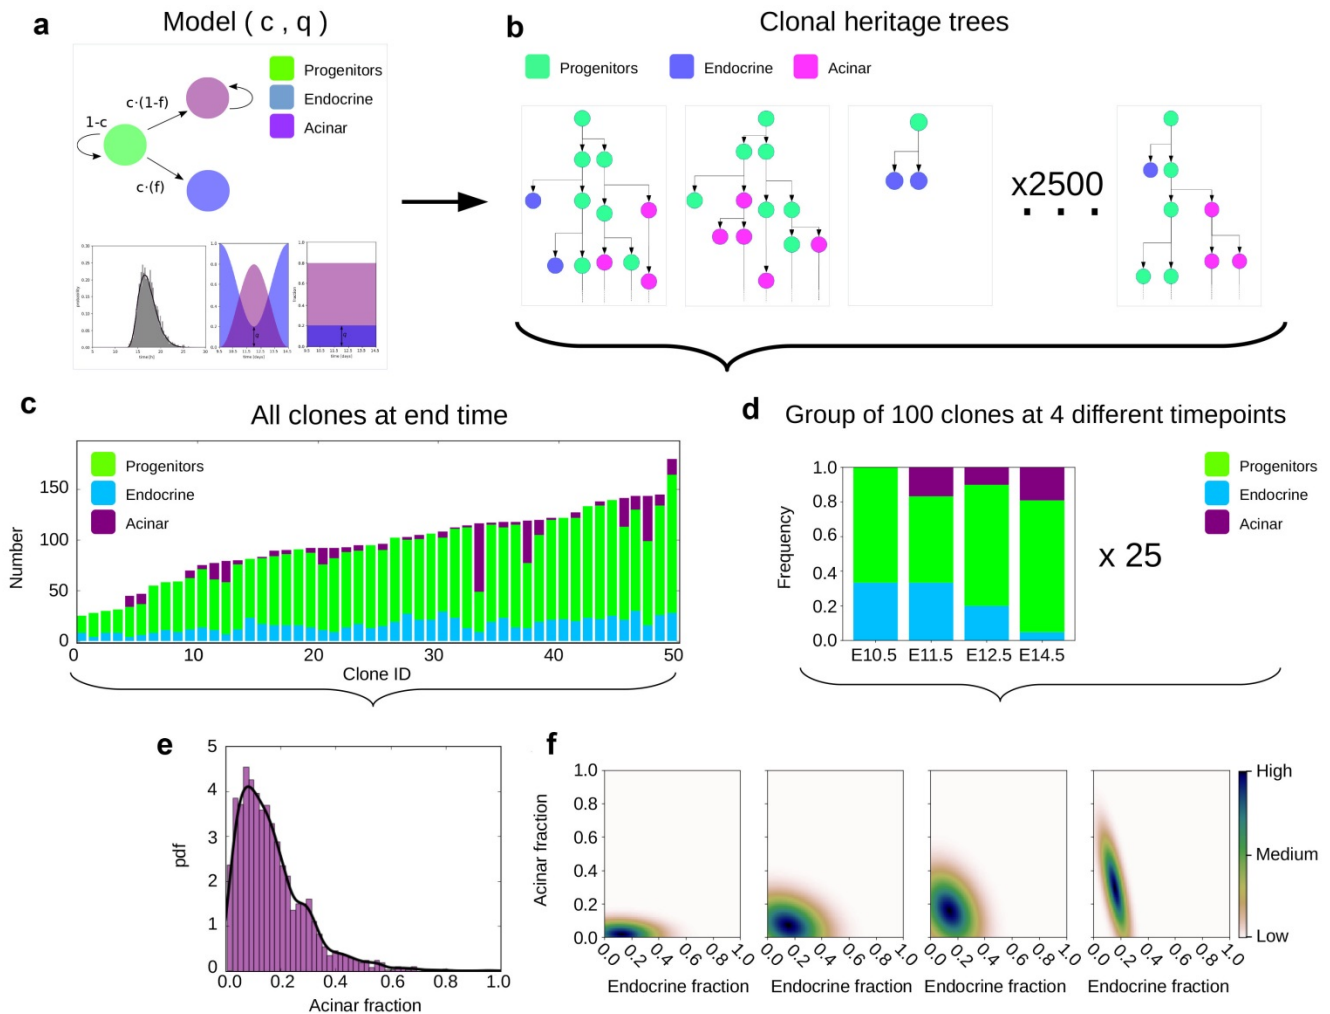

**Supplementary figure 8. Overall workflow from model simulations to approximate probability density**

**functions (PDFs).** (a) For a single model (either Model 1 or Model 2), a certain cell cycle distribution and one value of parameters  $c$  and  $q$  we can simulate how one progenitor clone expands for a period of 5 days, starting at E9.5. The color-scheme in (a)-(e) is the same as in Fig. 5: progenitors (green), endocrine (blue) and acinar (purple). (b) For each parameter set  $(c, q)$  we simulate 2500 expanding progenitor clones. (c) Based on the lineage for each of these simulated clones we make a histogram of clonal compositions at E14.5. Here only 50 clones are shown for simplicity. (d) From the histogram (c) we select all lineages with at least one purple cell and use a KDE to approximate the PDF underlying simulation results (shown in black). For comparison the PDF has been shown together with a histogram of the purple acinar fractions. (e) For groups each consisting of 100 in silico clones we have calculated the fractions of different types of cells at time points E10.5, E11.5, E12.5 and 14.5 (shown it as a bar chart). (f) Using both the acinar and endocrine fractions for each time point for the 25 groups (each of 100 simulated clones) we estimate the PDFs of having certain combinations of acinar and endocrine fraction. The color-scale ranges from black (highest values) to blue, green, brown and white (lowest values).

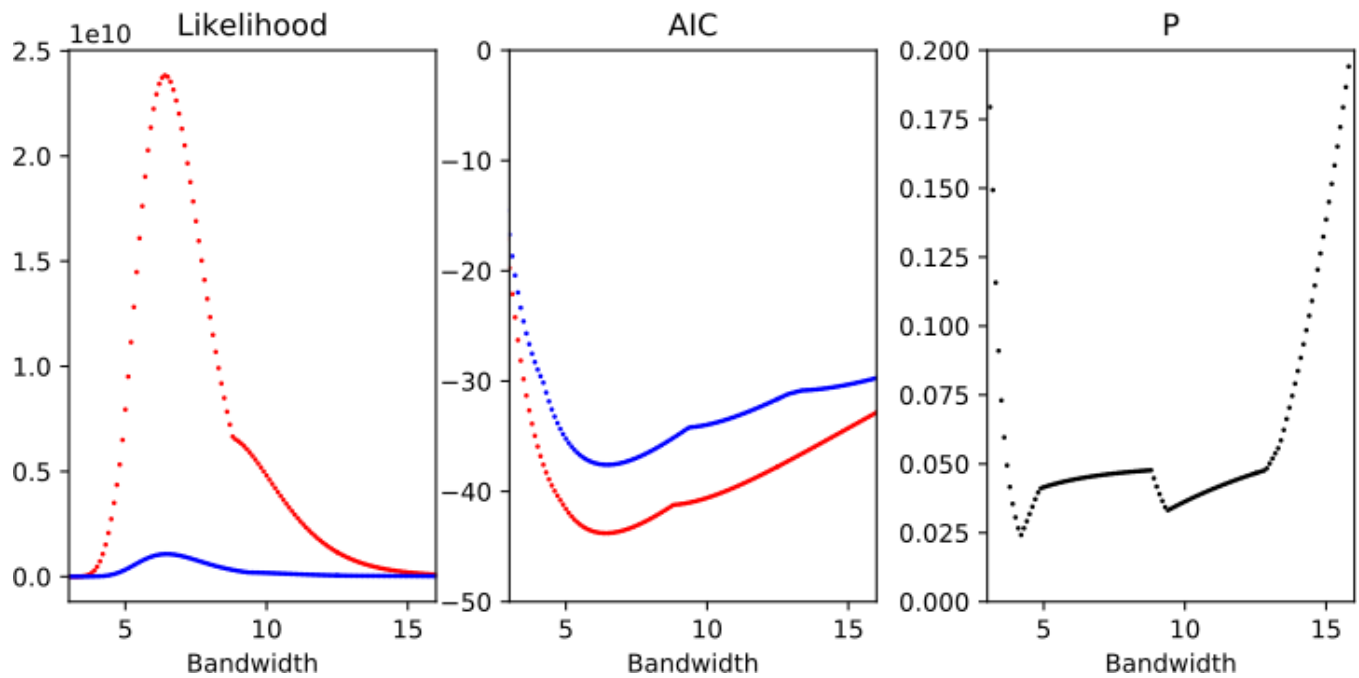

**Supplementary figure 9. Kernel Density Estimations of PDFs.** Left: Likelihood,  $L$ , that Model 1 (blue) and Model 2 (red) fit the data for their respective best parameter sets as a function of KDE bandwidth. Both models have a clear maximum at bandwidth of 6.5. Middle: Akaike Information Criterion (AIC) score for both models as a function of bandwidth. In line with likelihood, the minima in AIC is at bandwidth of 6.5. Right: Probability,  $P$ , that Model 1 and Model 2 are equally good.

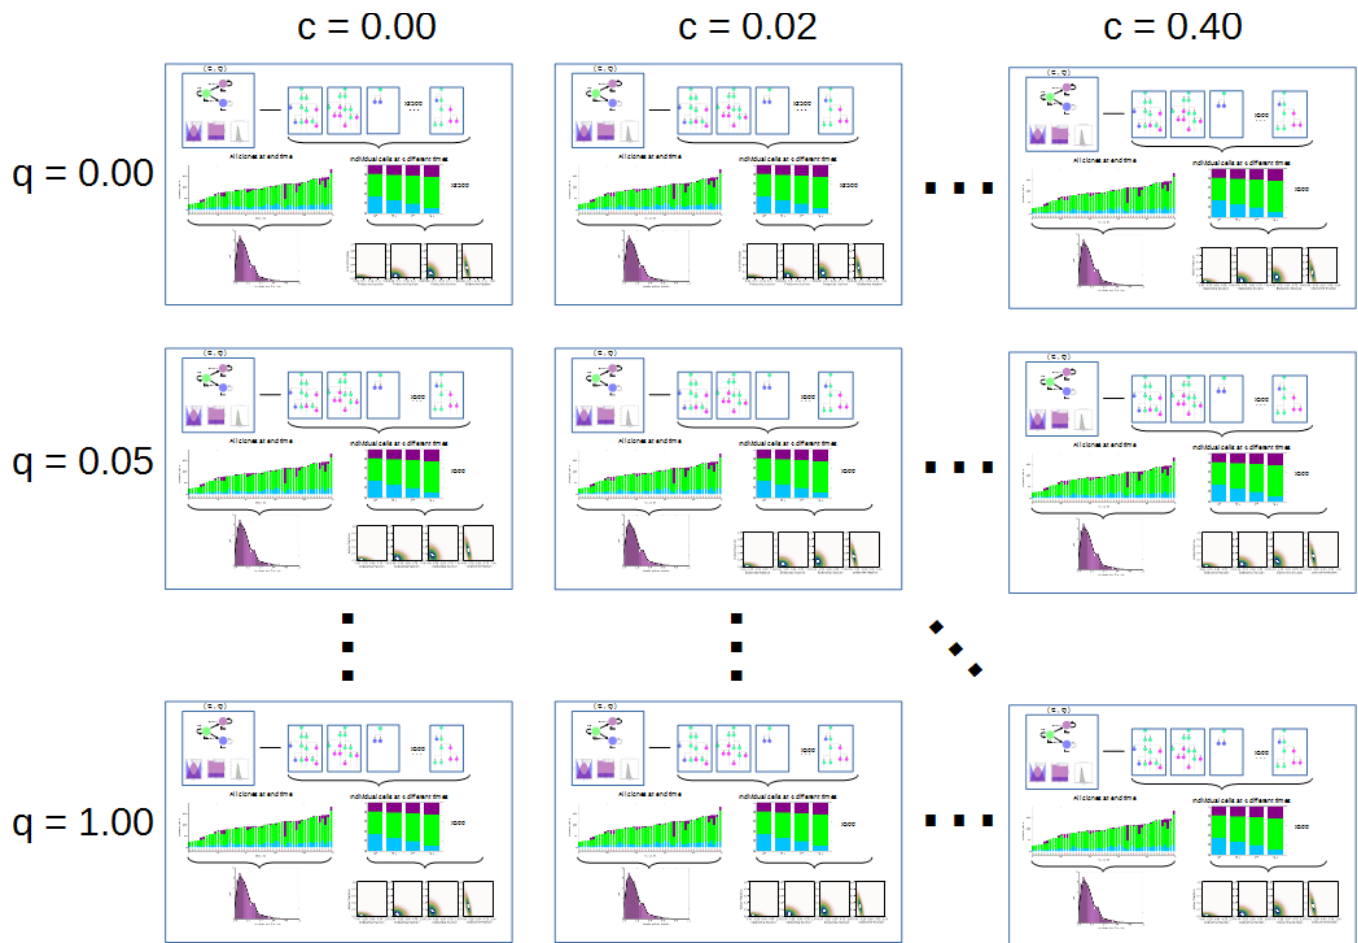

**Supplementary figure 10. Scanning parameter space for differentiation and endocrine versus acinar fate.** The parameter scan ranges from 0 to 0.4 in  $c$  and 0 to 1 in  $q$ , with 20 intervals. For each parameter combination we generate a model 1 and model 2 and generate 2500 progenitor cells at time E9.5. From here we do the same procedure as shown in Supplementary Fig. 8.

| <b>Antigen</b> | <b>Host species</b> | <b>Supplier</b> | <b>Dilution</b> |
|----------------|---------------------|-----------------|-----------------|
| CPA1           | Goat                | R & D systems   | 1/500           |
| E-CADHERIN     | Mouse               | Sigma Aldrich   | 1/200           |
| GFP            | Chick               | AbCam           | 1/1000          |
| HES1           | Rabbit              | Cell Signaling  | 1/1000          |
| HNF1B          | Goat                | Santa Cruz      | 1/500           |
| NEUROG3        | Goat                | BCBC            | 1/1000          |
| PAX6           | Mouse               | DSHB            | 1/400           |
| PDX1           | Goat                | BCBC            | 1/500           |
| PTF1A          | Rabbit              | BCBC            | 1/2000          |
| SOX9           | Rabbit              | Millipore       | 1/2000          |

BCBC: Beta Cell Biology Consortium  
DSHB: Developmental Studies Hybridoma Bank

**Supplementary table 1: List of antibodies**



| Target       | Forward sequence        | Reverse sequence       |
|--------------|-------------------------|------------------------|
| Actin        | CCCTAAGGCCAACCGTGAAA    | CAGCCTGGATGGCTACGTAC   |
| aPKC         | GCATCCAGACCACACACAGA    | TTGCCTCCTTTTCTCACCA    |
| Arx          | TTTCCAGAAGACGCACTACCC   | TCTGTCAAGTCCAGCCTCA    |
| Axin2        | GATCCACGGAAACAGCTGAA    | AGCCGGAACCTACGTGATAA   |
| Brn4         | AGGCCTTACAACCTGAGCTTCA  | GGATGAATCAGCCTCCTCCA   |
| Cdx2         | CGATACATCACCATCAGGAGGAA | TGGCTCTGCGGTTCTGAAA    |
| Cpa1         | GCAAAACTCGATCACACACC    | CTACTAGCTCCGGGCATCC    |
| Dll1         | CACCAAGTACCAGTCGGTGT    | TCCATCTTACACCTCAGTCGC  |
| Dll3         | TGCACGCCATTCCAGAC       | CGGCATTATCAGGCTCTTCA   |
| Dll4         | GAGAAGGTGCCACTTCGGTTA   | TAGAGTCCCTGGGAGAGCAAA  |
| Dusp6        | GCTGCTGCTCAAGAACTCA     | TCGGCCTGGAACCTACTGAA   |
| E-Cadherin   | ATTGCAAGTTCCTGCCATCC    | CAGTAGGAGCAGCAGGATCA   |
| Fbxw7        | AAAAGTTTGGTCAGCGGTCAC   | TCATCTGTGATGACCACACTCC |
| Fgfr2        | TCAAGTGGATGGCTCCTGAA    | CACATTAACACCCCGAAGGAC  |
| Fgfr4        | CTTCCACGGGGAGAATCGTA    | CGAGGGTACCACACTTTCCA   |
| Foxa1        | TGAGAGCAACGACTGGAACA    | CCGGAGTTCATGTTGCTGAC   |
| Foxa2        | TGAAGATGGAAGGGCACGAG    | CACGGAAGAGTAGCCCTCGG   |
| Fzd1         | CACGGTGCTCACGTACCTA     | TGTAACAGCCGGACAGGAAA   |
| Fzd2         | ACTCTGGAGCACCTTTCCA     | CGCGCTCACCCAGAACTTATA  |
| Fzd3         | TGACCAACAGACTGCAGCTTTA  | ATGGCCGAAAATCCCGAGAA   |
| Fzd4         | CTTTCACGCCGCTCATCC      | TGGCACATAAACCGAACAAA   |
| Fzd5         | GTTGCCACCTTCTCATTGAC    | AGGTAGCACGCAGACAAGAA   |
| Fzd6         | CGATGGCCTGAAGAACTGAA    | AGCTCTGTGTGGATGAGAA    |
| Fzd7         | GAGGTGCACCACTTCTACCC    | CGGGTGCCTACATAGAGCATAA |
| Fzd8         | TCTACAACCCGCTCAAGAC     | CGCTCATCTGGCTAAAGAA    |
| Fzd9         | CGGTTTTGTGGCTCTCTTCC    | TCAGCTTCTCCAGCTTCTCC   |
| Gapdh        | AGACGGCCGCATCTTCTT      | TTCACACCGACCTTACCAT    |
| Gata6        | CCCCTCATCAAGCCACAGAA    | AGGTAGTGGTTGTGGTGTGAC  |
| GFP          | TTCAAGGACGACGGCAACTA    | TCAGCTCGATGCGGTTCA     |
| Glucagon     | TGTGCAGTGGTTGATGAACA    | CCTTCAGCATGCCTCTCAAA   |
| Glut2        | CTCCAGGAAGGGTGCTAAACC   | TGCTCCCTATCCGTTCTTCAA  |
| Hes1         | ACTTAAGAAAGATAGCTCCCGGC | TCCGGAGGTGCTTACAGTC    |
| Hes1 nascent | ACACCGGACAAACCAAGAC     | GCTGTGCACAACCACTTAA    |
| Hes6         | GAGGATGAGGACCGCTGG      | AGACTCTCGTTGATCCGTGC   |
| Hey1         | ACGAGACCATCGAGGTGGAA    | CGTTGGGACATGGAACACA    |
| Hnf1b        | CGGCAAAAGAATCCAGCAA     | AGACCCCTCGTTGCAAACA    |
| Ins2         | ACCCACAAGTGGCACAACCTG   | TACAATGCCACGCTTCTGCT   |
| Insm1        | GTGTTCCCTGCAAGTACTG     | TCTATTCTCAGACGGGTGGC   |
| Isl1         | GGACAAGAAACGCAGCATCA    | GTTCTGTGATCCCTGGATA    |
| Jag1         | CTTCAATCTCAAGGCCAGCC    | CACCAGCAAAGTGTAGGACC   |
| Lrp6         | CCCCATGCACCTTAGTTCTGC   | CTGCTGAGGAGAACACGTTG   |
| MafB         | GGCAACTAACGCTGCAACTCT   | CAACGGAAGGGACTTGAACAC  |
| Maml1        | CACAAAGCACCTTCCCACAA    | CGGACCCAAGTTGTTTCATCC  |
| Mfng         | TTTCTGCATCAACCGCCAAC    | TGAGAGCAGAAGTGTCCACAAA |

**Supplementary table 2: Primers used for single cell qPCR**

| Target       | Forward sequence        | Reverse sequence       |
|--------------|-------------------------|------------------------|
| Mib1         | GTTCTCTGGGATAACGGTGCTA  | CTTTGGCATCCTGGACACAC   |
| Mki67        | GAGACATACCTGAGCCCATCA   | GCTTTGCTGCATCCGAGTA    |
| Mucin1       | AGTACCAAGCGTAGCCCTA     | CACCACAGCTGGGTTGGTATAA |
| Myc          | AGTGCTGCATGAGGAGACA     | TCTCCACAGACACCACATCAA  |
| Myt1         | CTTGCCAATATTCGCCTTCCA   | TGTCAGTGAGGGTGTTTACA   |
| Neur13       | TTCGTAGTGGTGAGCCTGTG    | GTGTTGGCAGTGTGTGGAA    |
| NeuroD       | GCTCCAGGGTTATGAGATCGT   | GCTCTCGCTGTATGATTTGGT  |
| Neurog3      | GACTGACCTGCTGCTCTA      | GCTCCGGGAAAAGGTTGTTG   |
| Ngn3 nascent | GACTGACCTGCTGCTCTA      | CATCCACCCTTTGGAGTTTCC  |
| Nkx2.2       | ACCGAGGGCCTCCAATACTC    | CCTGTGCTGTCGGTGACT     |
| Nkx3.2       | AGCGACAGCGAGATGTCA      | TGCACCTCCAGGGCTAAC     |
| Nkx6.1       | GGCCTATTCTCTGGGGATGAC   | GCTGCGTGCTTCTTTCTCC    |
| Notch1       | AGATGCTCAGGGTGTCTTCC    | GTGGAGTTGTGCCATCATGC   |
| Notch2       | TGGTTCTGGGACAAGTGAACA   | ACAGCAAAGCCTCATCTCA    |
| Notch3       | CCATGCCGATGTCAATGCA     | TAGCCTCCACGTTGTTTACA   |
| Patched1     | TGCTGGAGGAGAACAAGCAA    | CCAGTCACTGTCAAATGCATCC |
| Pax4         | ATCCCAGGCCTATCTCCAAC    | GGCCAGGCAAATCCACATA    |
| Pax6         | TATCCCGGGACTTCAGTACCA   | TGATGGAGTTGGTGTCTCTCC  |
| Pdx1         | TCCCTTCCCGTGGATGAAA     | TCGGGTTCCGCTGTGTAA     |
| Pecam1       | GCACAGTGATGCTGAACAAC    | GTCACCTTGGGCTTGATAC    |
| Prox1        | GCCCTCAACATGCACTACAAC   | CGTGATCTGCGCAACTTCC    |
| Ptf1a        | AGGACAGTCCCGGTAACCA     | TCAGTCCAGGAAAGAGAGTGC  |
| Rfx6         | GGCATCAAAGAAAGCAGTGCATA | TCTTCAGTTTGTCCCGAAA    |
| Sox17        | GCACAGCAGAACCCAGATCT    | GGTCAACGCCTTCCAAGAC    |
| Sox2         | TGAAGGAGCACCCGGATTATA   | CGGGAAGCGTGTACTTATCC   |
| Sox9         | AGTACCCGCATCTGCACAA     | GTCTCTTCTCGCTCTCGTTCA  |
| Spry1        | ACTGCACCAAGACCCGAAAA    | GGTGCTCGTAGCTGCTATTCA  |
| Spry2        | GGAGAGGGGTTGGTGCAAA     | AGGTCTGGCAGTGTGTTCA    |
| Tcf1         | AGGCCGAGATGCTATCTTCA    | TGCAGGGCTACTCTTGCTCA   |
| Ubc          | GTCTGCTGTGTGAGGACTGC    | CCTCCAGGGTGATGGTCTTA   |
| Vimentin     | GATTTCTCTGCCTCTGCCAAC   | CAACCAGAGGAAGTGACTCCA  |
| Wnt2b        | CTTTGACAACCTCCCTGACTAC  | TTCACACCCATCTGTTCTTT   |
| Wnt5a        | ACACAACAATGAAGCAGGCC    | GAGCCAGACACTCCATGACA   |
| Wnt5b        | ACCTACAGAACAACGAGGCT    | GACTCCGTGACATTTGCAGG   |
| Wnt7b        | CGCCTCATGAACCTTCAACAAC  | CCTGACACACCGTGACACTTA  |
| Wnt9a        | CGAGTGGACTTCCACAACAA    | GGCATTGCAAGTGGTTTCC    |
| Wnt9b        | GGCCCAAGAGAGGAAGCA      | GCACTTGCAAGTGTCTCA     |
| Yap1         | CTGCCGACTCCTTCTTCAA     | CCGCAGTACCTGCATCAGTA   |

**Supplementary table 2 continued: Primers used for single cell qPCR**

## Supplementary reference

1. Kim YH, Larsen HL, Rue P, Lemaire LA, Ferrer J, Grapin-Botton A. Cell cycle-dependent differentiation dynamics balances growth and endocrine differentiation in the pancreas. *PLoS biology* 13, e1002111 (2015).
